# Supplementary material
Source: HighWire-hosted journal article supplement (https://www.cmajopen.ca/highwire/filestream/90030/field_highwire_adjunct_files/2/open-2022-0188-reporting-checklist.pdf)
Supplement: open-2022-0188-reporting-checklist.pdf [file open-2022-0188-reporting-checklist.pdf]

Supplementary Table

**Supplementary Table 1.** Consolidated criteria for Reporting Qualitative research (COREQ) Checklist.

| <b>Domain 1: Research team and reflexivity</b>                                                                                                           |                                                                                                                                                                                                                                                                                                                                                                  |                                                      |
|----------------------------------------------------------------------------------------------------------------------------------------------------------|------------------------------------------------------------------------------------------------------------------------------------------------------------------------------------------------------------------------------------------------------------------------------------------------------------------------------------------------------------------|------------------------------------------------------|
| <i>Personal Characteristics</i>                                                                                                                          |                                                                                                                                                                                                                                                                                                                                                                  | <i>Location in Manuscript, section (page number)</i> |
| Which author/s conducted the interview or focus group?                                                                                                   | ES, JK, CS                                                                                                                                                                                                                                                                                                                                                       | Methods (Page 5)                                     |
| What were the researcher's credentials? E.g. PhD, MD                                                                                                     | NJ (MD, MSc), ES (BKin/BCom), JK (BSc), CS (MSc), JD (RN, PhD candidate), KMS (PhD)                                                                                                                                                                                                                                                                              | Title Page                                           |
| What was their occupation at the time of the study?                                                                                                      | NJ (Attending Physician), ES (Graduate Student), JK (Graduate Student), CS (Research Associate), JD (Graduate Student), MB (Attending Physician), JD (Attending Physician), KMS (Assistant Professor)                                                                                                                                                            | Not reported in manuscript                           |
| Was the researcher male or female?                                                                                                                       | Female: NJ, ES, JK, CS, JD, MB, KMS; Male: JD                                                                                                                                                                                                                                                                                                                    | Methods (Page 5 & 6)                                 |
| What experience or training did the researcher have?                                                                                                     | All (training in qualitative methods, facilitator experience)                                                                                                                                                                                                                                                                                                    | Methods (Page 6 & 7)                                 |
| <i>Relationship with participants</i>                                                                                                                    |                                                                                                                                                                                                                                                                                                                                                                  |                                                      |
| Was a relationship established prior to study commencement?                                                                                              | No                                                                                                                                                                                                                                                                                                                                                               | Methods (Page 6)                                     |
| What did the participants know about the researcher? e.g. personal goals, reasons for doing the research                                                 | Participants received an email outlining the objectives of the study, verification of ethical approval, and an informed consent form detailing the interview process. An additional oral consent process was completed with all participants and an opportunity to ask and answer all questions occurred prior to commencement of the semi-structured interview. | Methods (Page 7)                                     |
| What characteristics were reported about the interviewer/facilitator? e.g., Bias, assumptions, reasons and interests in the research topic               | Yes. Interviewers were graduate students and research associate                                                                                                                                                                                                                                                                                                  | Methods (Page 6)                                     |
| <b>Domain 2: Study design</b>                                                                                                                            |                                                                                                                                                                                                                                                                                                                                                                  |                                                      |
| <i>Theoretical framework</i>                                                                                                                             |                                                                                                                                                                                                                                                                                                                                                                  |                                                      |
| What methodological orientation was stated to underpin the study? e.g. grounded theory, discourse analysis, ethnography, phenomenology, content analysis | Interpretive description; inductive thematic analysis in accordance with Braun & Clarke methodology                                                                                                                                                                                                                                                              | Methods (Page 4)                                     |
| <i>Participant Selection</i>                                                                                                                             |                                                                                                                                                                                                                                                                                                                                                                  |                                                      |
| How were participants selected? e.g. purposive, convenience, consecutive, snowball                                                                       | Convenience                                                                                                                                                                                                                                                                                                                                                      | Methods (Page 5)                                     |
| How were participants approached? e.g. face-to-face, telephone, mail, email                                                                              | Recruited via e-mail, social media                                                                                                                                                                                                                                                                                                                               | Methods (Page 5)                                     |
| How many participants were in the study?                                                                                                                 | 12                                                                                                                                                                                                                                                                                                                                                               | Results (Page 7)                                     |

## Supplementary Table

|                                                                                                                                  |                                                                                                   |                                       |
|----------------------------------------------------------------------------------------------------------------------------------|---------------------------------------------------------------------------------------------------|---------------------------------------|
| How many people refused to participate or dropped out? Reasons?                                                                  | Not applicable                                                                                    | Not applicable                        |
| <i>Setting</i>                                                                                                                   |                                                                                                   |                                       |
| Where was the data collected? e.g. home, clinic, workplace                                                                       | Virtually via Zoom                                                                                | Methods (Page 5)                      |
| Was anyone else present besides the participants and researchers?                                                                | No                                                                                                | Methods (Page 5)                      |
| What are the important characteristics of the sample? e.g. demographic data, date                                                | Demographic data                                                                                  | Table 1, Results                      |
| <i>Data collection</i>                                                                                                           |                                                                                                   |                                       |
| Were questions, prompts, guides provided by the authors? Was it pilot tested?                                                    | Interview guides were provided by authors and reviewed by two senior surgeons                     | Methods (Page 5), Supplementary files |
| Were repeat interviews carried out? If yes, how many?                                                                            | No                                                                                                | Not reported in manuscript            |
| Did the research use audio or visual recording to collect the data?                                                              | All semi-structured interviews were audio-recorded only using the audio recording feature on Zoom | Methods (Page 5)                      |
| Were field notes made during and/or after the interview or focus group?                                                          | Yes, but field notes were not utilized in the data analysis                                       | Methods (Page 5)                      |
| What was the duration of the interviews or focus group?                                                                          | All interviews lasted approximately 30 minutes                                                    | Methods (Page 5)                      |
| Was data saturation discussed?                                                                                                   | Yes                                                                                               | Methods (Page 6)                      |
| Were transcripts returned to participants for comment and/or correction?                                                         | No                                                                                                | Methods (Page 5)                      |
| <b>Domain 3: analysis and findings</b>                                                                                           |                                                                                                   |                                       |
| <i>Data analysis</i>                                                                                                             |                                                                                                   |                                       |
| How many data coders coded the data?                                                                                             | Two (NJ, ES)                                                                                      | Methods (Page 6)                      |
| Did authors provide a description of the coding tree?                                                                            | Yes                                                                                               | Methods (page 6)                      |
| Were themes identified in advance or derived from the data?                                                                      | Inductive thematic analysis                                                                       | Methods (Page 6)                      |
| What software, if applicable, was used to manage the data?                                                                       | NVivo12                                                                                           | Methods (Page 6)                      |
| Did participants provide feedback on the findings?                                                                               | Interviewers and two participants reviewed Results                                                | Methods (Page 6)                      |
| <i>Reporting</i>                                                                                                                 |                                                                                                   |                                       |
| Were participant quotations presented to illustrate the themes/findings? Was each quotation identified? e.g., participant number | Yes. Quotations associated with participant number                                                | Results (Pages 8-12), Table 2         |
| Was there consistency between the data presented and the findings?                                                               | Yes                                                                                               | Results (Pages 8-12), Table 2         |
| Were major themes clearly presented in the findings?                                                                             | Yes                                                                                               | Results (Pages 7)                     |

Supplementary Table

|                                                                        |     |                     |
|------------------------------------------------------------------------|-----|---------------------|
| Is there a description of diverse cases or discussion of minor themes? | Yes | Results (Page 8-12) |
|------------------------------------------------------------------------|-----|---------------------|
